# Supplementary material for: Vitamin D Deficiency and Depressive Symptomatology in Psychiatric Patients Hospitalized with a Current Depressive Episode: A Factor Analytic Study
Source: PLOS journal article supplement (doi:10.1371/journal.pone.0138550), 2015-09-23
Supplement: S1 (10.1371/journal.pone.0138550.s001) [file journal.pone.0138550.s001]

**Table S1. Significant covariates of depressive symptoms from the multivariate fully adjusted prediction models**

| Variables              | HADS-D       |        | BDI-II       |        | BSI-D        |        | Negative affect factor |        | Anhedonia factor |        |
|------------------------|--------------|--------|--------------|--------|--------------|--------|------------------------|--------|------------------|--------|
|                        | B±s.e.       | P      | B±s.e.       | P      | B±s.e.       | P      | B±s.e.                 | P      | B±s.e.           | P      |
| Age (years)            |              |        | -0.182±0.044 | <0.001 | -0.082±0.022 | <0.001 | -0.024±0.004           | <0.001 |                  |        |
| Female sex             | -1.113±0.475 | 0.020  |              |        |              |        |                        |        | -0.245±0.107     | 0.023  |
| Dark skin pigmentation | 2.321±0.574  | <0.001 | 3.505±1.523  | 0.022  | 2.210±0.764  | 0.004  |                        |        | 0.616±0.130      | <0.001 |
| Anxiety disorder       |              |        |              |        |              |        |                        |        | 0.227±0.111      | 0.042  |
| PTSD                   |              |        | 4.939±2.188  | 0.025  |              |        | 0.479±0.181            | 0.008  |                  |        |
| Eating disorder        | 1.881±0.849  | 0.027  | 5.884±2.251  | 0.009  | 2.290±1.128  | 0.043  | 0.546±0.186            | 0.004  | 0.482±0.192      | 0.012  |
| Antidepressants        | 0.930±0.328  | 0.005  | 3.033±0.870  | 0.001  | 1.131±0.436  | 0.010  | 0.220±0.072            | 0.002  | 0.249±0.074      | 0.001  |
| Neuroleptic use        | 1.280±0.522  | 0.015  |              |        | 1.694±0.694  | 0.015  | 0.240±0.114            | 0.037  | 0.370±0.118      | 0.002  |
| Recurrent depression   |              |        |              |        | 1.564±0.609  | 0.011  | 0.264±0.100            | 0.009  |                  |        |

Value are unstandardized coefficients B with standard error (s.e.). Prescribed drugs were entered with 3 categories for antidepressants (0, 1, 2) and two categories for neuroleptics (0, ≥1). Read table as follows (example): Patients with PTSD had a 4.939±2.188 higher BDI score than those without PTSD after all other covariates (including vitamin D status) had been taken into account.

BDI-II, Beck Depression Inventory-II; BSI-D, depression subscale of the Brief Symptom Inventory; HADS-D, depression subscale of the Hospital Anxiety and Depression Scale; PTSD, posttraumatic stress disorder
